# Supplementary material
Source: PubMed Central journal article supplement (PMC6386169)
Supplement: NIHMS1518218-supplement-Supplemental_Publication_Material.pdf [file NIHMS1518218-supplement-Supplemental_Publication_Material.pdf]

## SUPPLEMENTAL MATERIAL

APPENDIX A

Table: MTurk Survey to Explore Public Perceptions on Why Women Receive Less CPR Than Men.

| Question                                                                                                                                          | Answer Choice(s)                                                                                                                                                                                                                                                             | Question Type*     |
|---------------------------------------------------------------------------------------------------------------------------------------------------|------------------------------------------------------------------------------------------------------------------------------------------------------------------------------------------------------------------------------------------------------------------------------|--------------------|
| Cardiopulmonary Resuscitation (CPR) is _____.                                                                                                     | <ul style="list-style-type: none"> <li>• Calling 911</li> <li>• Stopping Bleeding when someone is injured</li> <li>• Providing chest compressions to an unresponsive person</li> <li>• The Heimlich maneuver for someone who is choking</li> </ul>                           | Knowledge question |
| How old are you?                                                                                                                                  | [Free Text]                                                                                                                                                                                                                                                                  | Demographic        |
| How do you identify (check the one that best describes you)?                                                                                      | <ul style="list-style-type: none"> <li>• Female</li> <li>• Male</li> <li>• Transgender</li> <li>• Non-binary</li> </ul>                                                                                                                                                      | Demographic        |
| What is your race/ethnicity (check the one that best describes you)?                                                                              | <ul style="list-style-type: none"> <li>• American Indian or Alaska Native</li> <li>• Asian</li> <li>• Black or African American</li> <li>• Hispanic or Latino</li> <li>• Native Hawaiian or Other Pacific Islander</li> <li>• White or Caucasian</li> <li>• Other</li> </ul> | Demographic        |
| What is the highest level of education you have completed?                                                                                        | <ul style="list-style-type: none"> <li>• Less than a High School Diploma</li> <li>• High School Diploma/Equivalent</li> <li>• Some College</li> <li>• College Diploma</li> <li>• Graduate Training and beyond</li> </ul>                                                     | Demographic        |
| What state do you currently live in?                                                                                                              | [50 States listed out]                                                                                                                                                                                                                                                       | Demographic        |
| Previous literature internationally and nationally has shown that women receive bystander cardiopulmonary resuscitation less often than men, even | <ul style="list-style-type: none"> <li>a) Women less than men</li> <li>b) Women more than men</li> <li>c) Neither sex predominates</li> <li>d) None of the above</li> </ul>                                                                                                  | Attention question |

|                                                                                                                                                                                                                                                                                                                                                                               |                                                                                                                                                                                                                                                   |                                  |
|-------------------------------------------------------------------------------------------------------------------------------------------------------------------------------------------------------------------------------------------------------------------------------------------------------------------------------------------------------------------------------|---------------------------------------------------------------------------------------------------------------------------------------------------------------------------------------------------------------------------------------------------|----------------------------------|
| <p>when they suffer a witnessed cardiac arrest in public. The reasons for why this is have not been elucidated. Experts in the field have theorized why this might be, but truly, we just don't know. If you have read this question, please mark the letter a. We are very eager to learn your perspective by way of this survey.</p>                                        |                                                                                                                                                                                                                                                   |                                  |
| <p>From studies we know that women receive bystander CPR less often than men. Do you have any ideas on why women may be less likely to receive CPR when they collapse in public?</p>                                                                                                                                                                                          | <p>[Free text]</p>                                                                                                                                                                                                                                | <p>Free-text survey question</p> |
| <p>We know that providing CPR and early defibrillation via automated external defibrillator (AED) are evidence based ways to improve survival from cardiac arrest. Most people who learn these methods take a training course that can either be in person or online. To show that you have read this far in the question ignore the question below and choose Red Cross.</p> | <ul style="list-style-type: none"> <li>○ American Heart Association</li> <li>○ Red Cross</li> <li>○ American Heart Association CPR anytime kit</li> <li>○ Online training program (various organizations)</li> <li>○ None of the above</li> </ul> | <p>Attention question</p>        |

|                                                                                                        |                                                                                                                                                                                                                                                                                                                                                    |                        |
|--------------------------------------------------------------------------------------------------------|----------------------------------------------------------------------------------------------------------------------------------------------------------------------------------------------------------------------------------------------------------------------------------------------------------------------------------------------------|------------------------|
| Do not select any other answer. Where can one learn how to provide CPR (please select all that apply)? |                                                                                                                                                                                                                                                                                                                                                    |                        |
| Do you know how to perform CPR?                                                                        | <ul style="list-style-type: none"> <li>• Yes</li> <li>• No</li> </ul>                                                                                                                                                                                                                                                                              | Informational question |
| If yes, what was the primary reason that you sought CPR training (please select all that apply)?       | <ul style="list-style-type: none"> <li>○ I am required for a work or volunteering activity</li> <li>○ I am the primary caretaker to a family member who might need CPR in the future</li> <li>○ I have children at home and CPR might be necessary for an emergency</li> <li>○ I felt a responsibility to my community</li> <li>○ Other</li> </ul> | Informational question |
| If other, why?                                                                                         | [Free text]                                                                                                                                                                                                                                                                                                                                        | Informational question |
| Have you ever provided CPR to someone in public, at work, or at home?                                  | <ul style="list-style-type: none"> <li>• Yes</li> <li>• No</li> </ul>                                                                                                                                                                                                                                                                              | Informational question |
| If yes, have you ever provided CPR to a woman?                                                         | <ul style="list-style-type: none"> <li>• Yes</li> <li>• No</li> </ul>                                                                                                                                                                                                                                                                              | Informational question |

\*This column was not provided to the survey respondent but is included in this supplemental material for reference.
